# Supplementary material
Source: Springer Nature journal article supplement (https://www.springermedizin.de/resource/supplementary/13033_2014_199_MOESM4_ESM.pdf/9652044)

## Percentage of correct answers

**a**

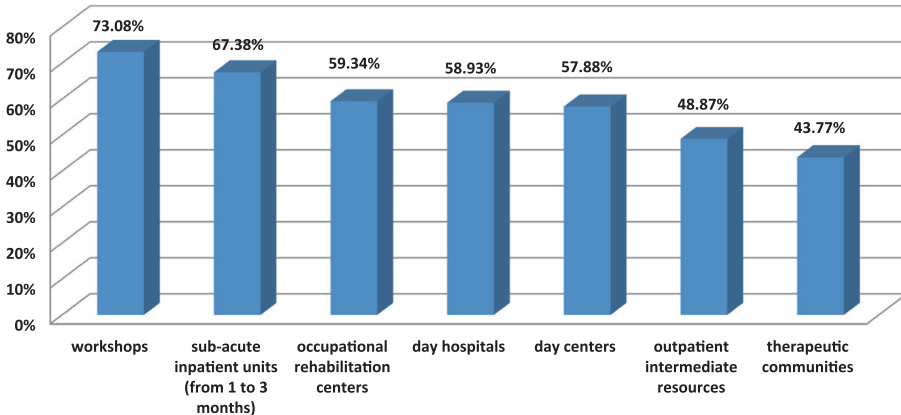

**b**

## Percentage of correct answers

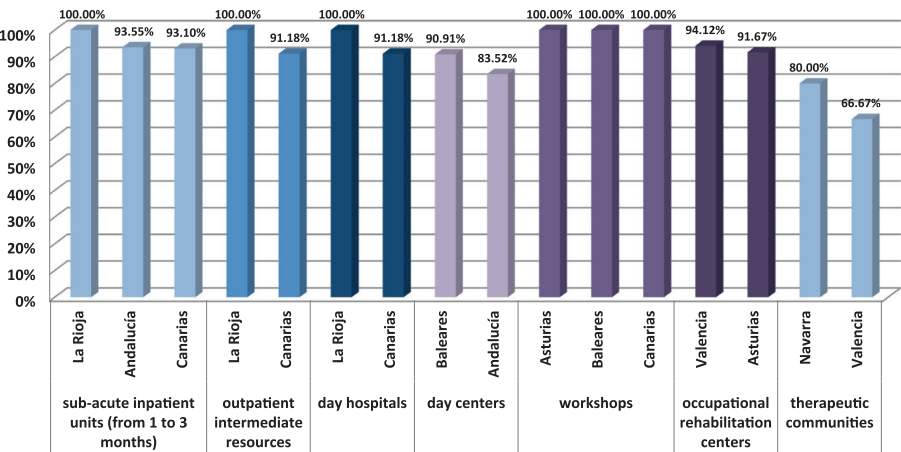

Supplement: MOESM4 [file 9652044]
